# Supplementary material for: Formation of two-dimensional diamond-like colloidal crystals using layer-by-layer electrostatic self-assembly
Source: Royal Society of Chemistry journal article supplement (doi:10.1039/d3sm01278f), 2023-12-27
Supplement: d3sm01278f2.pdf [file d3sm01278f2.pdf]

## Supporting Information

### Formation of Two-Dimensional Diamond-Like Colloidal Crystals Using Layer-by-Layer Electrostatic Self-Assembly

Minori Fujita, Akiko Toyotama, Tohru Okuzono, Hiromasa Niinomi and Junpei Yamanaka

#### 1. The refractive index of titania

Dielectric dispersion representing titania in the FDTD simulation was produced by fitting experimental data of dielectric dispersion of titania<sup>S1</sup> using Lorentz–Drude function based on quantum annealing. The dielectric dispersion of the Lorentz-Drude model,  $\varepsilon^*(\omega)$  is given by

$$\varepsilon^*(\omega) = \varepsilon_0 \left\{ \varepsilon_\infty + \frac{f_d \omega_p^2}{-\omega^2 + j\omega\Gamma_d} + \sum_{n=1}^m \frac{f_n \omega_p^2}{\omega_n^2 - \omega^2 + j\omega\Gamma_n} \right\}. \quad (\text{S11})$$

Here,  $\varepsilon_0$  is the permittivity of a vacuum,  $\varepsilon_\infty$  the relative instantaneous permittivity,  $\omega_p$  the plasma frequency,  $\Gamma_d$  the damping frequency of the Drude term,  $f_d$  the oscillator strength of the Drude term,  $m$  the number of Lorentz terms,  $\omega_n$  the resonance frequency of the  $n$ -th Lorentz term,  $\Gamma_n$  the damping frequency of the  $n$ -th Lorentz term,  $f_n$  the oscillator strength of the  $n$ -th Lorentz term, and  $\omega$  the angular frequency of light. Table S1 shows the parameters of the Lorentz-Drude function.

**Table S1.** Parameters of Lorentz - Drude model determined by fitting the experimentally obtained dielectric function of titania.

|                      |                         |
|----------------------|-------------------------|
| $m$                  | 1                       |
| $\varepsilon_\infty$ | 1                       |
| $\omega_p$           | 661.4411 THz            |
| $\omega_1$           | 1191.053 THz            |
| $\Gamma_d$           | 0 THz                   |
| $\Gamma_1$           | 0 THz                   |
| $f_d$                | $1.1108 \times 10^{-5}$ |
| $f_1$                | 19.916                  |

## 2. FDTD simulation

Numerical EM-field analysis based on the FDTD method was performed by the commercial software Opti FDTD (Optiwave Systems Inc., Ottawa, Canada). Here, diamond structures of titania particles with 3- to 16-layers of 2D crystals and the refractive index (see S11) in air were assumed. The  $x$ - and  $y$ - dimensions of the simulation box were fixed at  $2.5\ \mu\text{m}$  and  $2\ \mu\text{m}$ , respectively, and  $z$ - dimension was set to  $1\ \mu\text{m}$  (for the number of layers,  $N = 3$  and  $4$ ),  $1.5\ \mu\text{m}$  ( $N = 8$ ) and  $2.5\ \mu\text{m}$  ( $N = 16$ ); from  $-1.25$  to  $+1.25\ \mu\text{m}$  in the  $x$ -coordinate, from  $0$  to  $+2\ \mu\text{m}$  in the  $y$ -coordinate, and from  $0$  to a maximum of  $+2.5\ \mu\text{m}$  in the  $z$ -coordinate). Anisotropic perfectly matched layer boundary condition was adopted for all the outer surfaces of the simulation box. A two-dimensional pulsed light source was set at  $z = 0.2\ \mu\text{m}$ .

The waveform type, amplitude, center wavelength of the pulse wave, FWHM of the pulse and incident direction were set to Sine-Modulated Gaussian Pulse,  $1.0\ \text{V/m}$ ,  $700\ \text{nm}$  ( $428.275\ \text{THz}$ ),  $220.636\ \text{THz}$  and  $+z$  to analyze the spectrum in the range from  $500\ \text{nm}$  to  $1000\ \text{nm}$ . The discretization conditions of spatial coordination and time domain were  $\Delta x = \Delta y = \Delta z = 0.005\ \mu\text{m}$  and  $\Delta t = 9.244 \times 10^{-18}\ \text{sec}$ . Calculation for each structure was carried out for  $30000$  steps. Figure 10(c) of the main text shows the reflection and transmission spectra obtained from the numerical analyses.

## Reference

S1 J. R. DeVore, *J. Opt. Soc. Am.*, 1951, **41**, 416-419.
